# Supplementary material for: Thermal insulation fibers with a Kevlar aerogel core and a porous Nomex shell
Source: Royal Society of Chemistry journal article supplement (doi:10.1039/d1ra06846f), 2021-01-01
Supplement: d1ra06846f1.pdf [file d1ra06846f1.pdf]

# Thermal Insulation Fibers with a Kevlar Aerogel Core and a Porous Nomex Shell

Yueyan Sun <sup>1</sup>, Weiwang Chen <sup>1\*</sup>, Xiaomeng Zhou <sup>1</sup>

<sup>1</sup> Key Laboratory of Civil Aviation Thermal Hazards Prevention and Emergency Response, Civil Aviation University of China, Tianjin 300300, P. R. China

**Corresponding author:** W. Chen (E-mail: [ww\\_chen@cauc.edu.cn](mailto:ww_chen@cauc.edu.cn))

## Acknowledgements

This work was supported by National Natural Science Foundation of China (Grant No. 51904312) and Scientific Research Foundation of Civil Aviation University of China (2020KYQD115). The authors are deeply grateful to these supports.

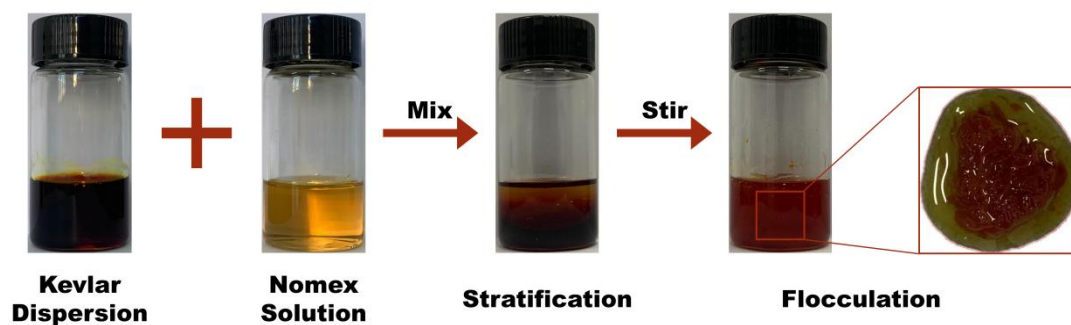

**Figure S1.** Process of mixing Kevlar dispersion and Nomex solution.

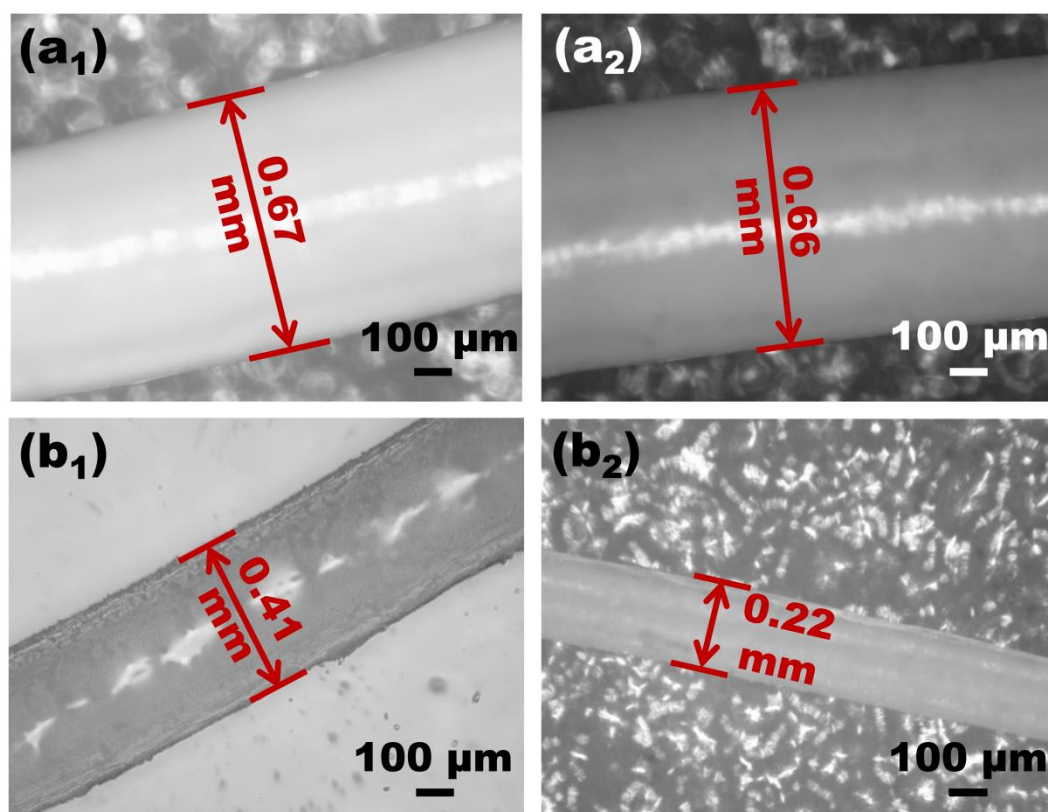

**Figure S2.** (a) Microscope images of Nomex shell which was (a<sub>1</sub>) before and (a<sub>2</sub>) after naturally air-dried. (b) Microscope images of Kevlar core which was (b<sub>1</sub>) before and (b<sub>2</sub>) after naturally air-dried.

**Table S1.** The force of samples at second breaking.

| No. | Group 1 (25G)/N | Group 2 (28G)/N |
|-----|-----------------|-----------------|
| 1   | 0.09193         | 0.09240         |
| 2   | 0.16275         | 0.12955         |
| 3   | 0.27009         | 0.20948         |
| 4   | 0.39166         | 0.32979         |
| 5   | 0.59794         | 0.51358         |
